# Supplementary material for: Natural variants of ELF3 affect thermomorphogenesis by transcriptionally modulating PIF4-dependent auxin response genes
Source: PubMed Central journal article supplement (PMC4535396; doi:10.1186/s12870-015-0566-6), 2015-08-14
Supplement: 12870_2015_566_MOESM2_ESM.pdf [file 12870_2015_566_MOESM2_ESM.pdf]

| trait                              | 20 °C         | 28 °C         | TIHE <sup>e</sup> |
|------------------------------------|---------------|---------------|-------------------|
| <b>n<sup>a</sup></b>               | 400 (4   16)  | 395 (3   22)  | 387 (4   22+7)    |
| <b>mean ± SD<sup>b</sup></b>       | 1.138 ± 0.173 | 2.033 ± 0.563 | 80.97 ± 51.86     |
| <b>range (min–max)<sup>b</sup></b> | 0.711 – 1.680 | 0.976 – 3.781 | -20.34 – 258.68   |
| <b>SW-Test<sup>c</sup></b>         | 0.0050        | 0.0000        | 0.0000            |
| <b>skewness<sup>b</sup></b>        | 0.376         | 0.949         | 0.906             |
| <b>kurtosis<sup>b</sup></b>        | 0.076         | 0.561         | 0.551             |
| <b>BSH ± SD<sup>d</sup></b>        | 0.6861        | 0.8266        | 0.898 ± 0.004     |

<sup>A</sup> Number of RILs included in the QTL analysis. Numbers in brackets indicate lines omitted from the analysis due to z-score threshold outside of 3 or experimental reasons (e.g. failure to germinate), respectively.

<sup>b</sup> Values determined after removing lines outside z-score threshold of three.

<sup>c</sup> Shapiro-Wilk-Test calculated after removing lines outside z-score threshold of three.

<sup>d</sup> Broad-sense heritability calculated only for lines present in all datasets (n=387).

<sup>e</sup> Temperature-induced hypocotyl elongation (28 °C vs. 20 °C).
