# Supplementary material for: Natural variants of ELF3 affect thermomorphogenesis by transcriptionally modulating PIF4-dependent auxin response genes
Source: PubMed Central journal article supplement (PMC4535396; doi:10.1186/s12870-015-0566-6), 2015-08-14
Supplement: 12870_2015_566_MOESM3_ESM.pdf [file 12870_2015_566_MOESM3_ESM.pdf]

| trait | cim QTL        |     |          |           |         | stepwise QTL     |                          |     |               |                |           |             |                    |                               |                      |                        |
|-------|----------------|-----|----------|-----------|---------|------------------|--------------------------|-----|---------------|----------------|-----------|-------------|--------------------|-------------------------------|----------------------|------------------------|
|       | QTL            | Chr | position | LOD score | P-value | QTL              | total R <sup>2</sup> (%) | Chr | position (cM) | closest marker | LOD score | 95% CI (cM) | R <sup>2</sup> (%) | model                         | additive effect      | F-test (P-value)       |
| 20°C  | <i>GIR20_1</i> | 1   | 2        | 5.43      | 0       | <i>GIR20_1</i>   | 19.718                   | 1   | 7             | F21<br>M12     | 8.6       | 3-11        | 8.3487             | Y-Q1+Q2+Q3+Q1:<br>Q3          | 0.0388<br>(0.0084)   | 3.27*10 <sup>-9</sup>  |
|       |                |     |          |           |         | <i>GIR20_2</i>   |                          | 2   | 60            | MSAT<br>2.10   | 2.7       | 24-64.6     | 2.5922             | Y-Q1+Q2+Q3+Q1:<br>Q3          | 0.0302<br>(0.0086)   | 0.0005                 |
|       |                |     |          |           |         | <i>GIR20_3</i>   |                          | 3   | 15            | MSAT<br>305754 | 11.8      | 4-18        | 11.6479            | Y-Q1+Q2+Q3+Q1:<br>Q3          | -0.0598<br>(0.0094)  | 2.4*10 <sup>-12</sup>  |
| 28°C  |                |     |          |           |         | <i>GIR28_1</i>   | 52.603                   | 1   | 18            | IND<br>6375    | 24.0      | 17-20       | 15.3340            | Y-Q1+Q2+Q3+Q4<br>+Q5+Q6+Q1:Q2 | 0.2314<br>(0.0209)   | 0                      |
|       |                |     |          |           |         | <i>GIR28_2</i>   |                          | 2   | 36            | MSAT<br>2.41   | 33.9      | 35-37       | 22.9690            | Y-Q1+Q2+Q3+Q4<br>+Q5+Q6+Q1:Q2 | -0.2833<br>(0.0210)  | 0                      |
|       |                |     |          |           |         | <i>GIR28_4</i>   |                          | 4   | 24.2          | MSAT<br>4.35   | 2.8       | 13-30       | 1.5963             | Y-Q1+Q2+Q3+Q4<br>+Q5+Q6+Q1:Q2 | 0.0718<br>(0.0199)   | 0.0003                 |
|       |                |     |          |           |         | <i>GIR28_5.1</i> |                          | 5   | 1             | MSAT<br>500027 | 3.8       | 0-22        | 2.1614             | Y-Q1+Q2+Q3+Q4<br>+Q5+Q6+Q1:Q2 | -0.0885<br>(0.0211)  | 3.3*10 <sup>-5</sup>   |
|       |                |     |          |           |         | <i>GIR28_5.2</i> |                          | 5   | 43            | MSAT<br>512110 | 8.0       | 36-47       | 4.6193             | Y-Q1+Q2+Q3+Q4<br>+Q5+Q6+Q1:Q2 | -0.1318<br>(0.0215)  | 2.03*10 <sup>-9</sup>  |
|       |                |     |          |           |         | <i>GIR28_5.3</i> |                          | 5   | 71.6          | MSAT<br>5.12   | 4.8       | 69-88       | 2.7520             | Y-Q1+Q2+Q3+Q4<br>+Q5+Q6+Q1:Q2 |                      | 3*10 <sup>-6</sup>     |
| TIHE  |                |     |          |           |         | <i>GIR1</i>      | 43.293                   | 1   | 26            | MSAT<br>108193 | 10.5      | 16-28       | 7.5838             | Y-Q1+Q2+Q3+Q4<br>+Q5+Q2:Q4    | 14.8284<br>(2.0800)  | 5.13*10 <sup>-12</sup> |
|       |                |     |          |           |         | <i>GIR2.1</i>    |                          | 2   | 35            | MSAT<br>2.41   | 23.2      | 35-36       | 18.0554            | Y-Q1+Q2+Q3+Q4<br>+Q5+Q2:Q4    | -22.1834<br>(2.1771) | 0                      |
|       |                |     |          |           |         | <i>GIR2.2</i>    |                          | 2   | 62            | MSAT<br>2.22   | 5.2       | 59-64.6     | 3.6010             | Y-Q1+Q2+Q3+Q4<br>+Q5+Q2:Q4    | -11.5189<br>(2.3449) | 1.34*10 <sup>-6</sup>  |
|       |                |     |          |           |         | <i>GIR5.1</i>    |                          | 5   | 35            | NGA<br>139     | 7.2       | 29-40       | 5.0786             | Y-Q1+Q2+Q3+Q4<br>+Q5+Q2:Q4    | -12.8525<br>(2.4091) | 8.36*10 <sup>-8</sup>  |
|       |                |     |          |           |         | <i>GIR5.2</i>    |                          | 5   | 71            | MSAT<br>5.12   | 2.6       | 56-91.2     | 1.7793             | Y-Q1+Q2+Q3+Q4<br>+Q5+Q2:Q4    | -7.4189<br>(2.1485)  | 0.0006                 |

**Chr**, chromosome; **CI**, confidence interval; **cim**, composite interval mapping; **cM**, centimorgan; **GIR**, *GIRAFFE*; **LOD**, logarithm of odds; **QTL**, quantitative trait locus; **R<sup>2</sup>**, phenotypic variance; **TIHE**, temperature-induced hypocotyl elongation
