# Supplementary material for: Natural variants of ELF3 affect thermomorphogenesis by transcriptionally modulating PIF4-dependent auxin response genes
Source: PubMed Central journal article supplement (PMC4535396; doi:10.1186/s12870-015-0566-6), 2015-08-14

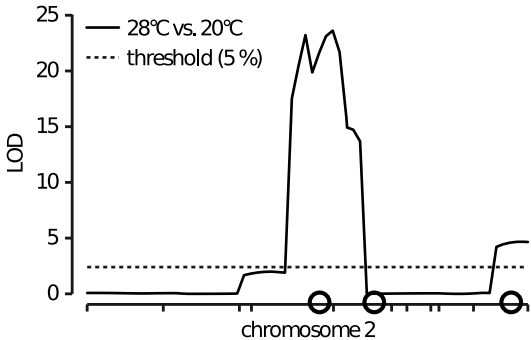

Supplement: 12870_2015_566_MOESM6_ESM.pdf [file 12870_2015_566_MOESM6_ESM.pdf]
